# Supplementary material for: COVID-19 lockdown emission reductions have the potential to explain over half of the coincident increase in global atmospheric methane
Source: Copernicus journal article supplement (doi:10.5194/acp-22-14243-2022), 2022-11-08
Supplement: Supplementary file 1 [file acp-22-14243-2022-supplement.zip]

Archive with 2 entries (2 files):
- acp-22-14243-2022-supplement-title-page.pdf
- Stevenson_et_al_2022_Supplementary_Material.xlsx
