# Supplementary material for: COVID-19 lockdown emission reductions have the potential to explain over half of the coincident increase in global atmospheric methane
Source: Copernicus journal article supplement (doi:10.5194/acp-22-14243-2022), 2022-11-08
Supplement: Supplementary file 1 [file acp-22-14243-2022-supplement.zip › acp-22-14243-2022-supplement-title-page.pdf]

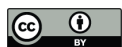

*Supplement of*

**COVID-19 lockdown emission reductions have the potential to explain over half of the coincident increase in global atmospheric methane**

**David S. Stevenson et al.**

*Correspondence to:* David S. Stevenson ([david.s.stevenson@ed.ac.uk](mailto:david.s.stevenson@ed.ac.uk))

- [acp-22-14243-2022-supplement-title-page.pdf](#)
- [Stevenson\\_et\\_al\\_2022\\_Supplementary\\_Material.xlsx](#)

The copyright of individual parts of the supplement might differ from the article licence.
