# Supplementary material for: COVID-19 lockdown emission reductions have the potential to explain over half of the coincident increase in global atmospheric methane
Source: Copernicus journal article supplement (doi:10.5194/acp-22-14243-2022), 2022-11-08
Supplement: Supplementary file 1 [file Stevenson_et_al_2022_Supplementary_Material.xlsx]

## Sheet: Table S1
Table S1: Global total methane loss to tropospheric OH (Tg/yr) from the HTAP experiments reported in Fry et al. (2012).
	FRSGCUCI-v01	GISS-PUCCINI-modelE	MOZARTGFDL-v2	TM5-JRC-cy2-ipcc-v1		MOZECH-v16	CAMCHEM-3311m13	GMI-v02f	INCA-vSSz	LLNL-IMPACT-T5a	STOC-HadAM3-v01	UM-CAM-v01		4MM	MMM
SR1	571.72	457.73	476.8	545.78		445.1	420	478.29	508.21	800.32	508.65	399.01
SR1 (Global)	571.367	457.216	476.286	544.778
SR2	493.2	392.06	405.44	471.65		377.69	357.03	406.99	431.92	686.66	431.67	336.17
SR3EU	570.13	456.87	475.2	544.06		443.89	418.26	476.47	506.71		507.05	397.14
SR3NA	569.35	456.24	474.05	543.37		442.85	417.27	474.71	505.77		506.3	395.63
SR3SA	570.25	456.62	475.36	544.25		444.1	418.76	476.45	506.95		507.27	396.52
SR3EA	569.9	456.12	474.99	543.8		443.53	418.21	475.83	506.28		507.07	396.29
SR3GL	558.211	443.252	461.315	531.093
SR4EU	572.35	457.65	476.98	546.62		445.5	421.6	478.45	508.41	800.57	508.85	399.75
SR4NA	572.12	457.65	476.86	546.08		445.43	421.01	478.69	508.43	800.43	508.77	399.53
SR4SA	572.13	457.77	476.95	546.31		445.3	420.4	478.5	508.4	800.42	508.85	399.36
SR4EA	572.18	457.59	476.85	546.4		445.35	420.54	478.56	508.27	800.35	508.79	399.55
SR4GL	574.282	457.203	477.025	549.349
SR5EU	572.64	458.92	477.85	546.54		445.49	420.82	479.37	508.91	801.16	509.21	399.84
SR5NA	572.99	459.56	477.78	546.76		445.37	421.23	479.62	508.96	801.3	509.45	400.2
SR5SA	572.49	458.71	477.48	546.52		445.86	421.01	479.28	509.14	801.34	509.17	399.68
SR5EA	572.93	460.28	477.88	546.93		445.99	421.76	480.37	509.46	801.56	509.41	400.11
SR5GL	577.614	473.32	481.765	550.454
Notes:
These are annual global mean tropospheric fluxes (Tg/yr) through the CH4+OH reaction, for each model, for various HTAP experiments.
SR1: base case experiment (2001 emissions).
SR1 (Global): is almost identical to SR1, but the analysis for the global perturbations was done later and using very slightly different methods. This is used for the base for the global NOx, CO and NMVOC experiments.
SR2: global -20% reduction in prescribed CH4 concentrations.
SR3: 4 regional (Europe: EU; North America: NA; South Asia: SA; East Asia: EA) and global (GL) -20% reductions in anthropogenic NOx emissions.
SR4: As SR3 but for anthropogenic NMVOC emissions.
SR5: As SR3 but for anthropogenic CO emissions.
NB there are no SR3 results from the LLNL-IMPACT-T5a model.

## Sheet: Table S2
Table S2: Whole model atmosphere methane burden (Tg).
	FRSGCUCI-v01	GISS-PUCCINI-modelE	MOZARTGFDL-v2	TM5-JRC-cy2-ipcc-v1		MOZECH-v16	CAMCHEM-3311m13	GMI-v02f	INCA-vSSz	LLNL-IMPACT-T5a	STOC-HadAM3-v01	UM-CAM-v01		4MM	MMM
SR1	4974.1	4978.2	4975.7	4923		4984	4982.4	4964.5	5094.6	4951.8	4734.4	4986.3
SR1 (Global)	4974.1	4978.2	4975.7	4923
SR2	3978.8	3981.7	3979.8	3946.8		3987.6	3984.8	3978.5	4075.5	3969	3787.4	3989.1
SR3EU	4974.1	4978.2	4975.7	4923		4984	4982.4	4964.5	5094.6	4951.8	4734.4	4986.3
SR3NA	4974.1	4978.2	4975.7	4923		4984	4982.4	4964.5	5094.6	4951.8	4734.4	4986.3
SR3SA	4974.1	4978.2	4975.7	4923		4984	4982.4	4964.5	5094.6	4951.8	4734.4	4986.3
SR3EA	4974.1	4978.2	4975.7	4923		4984	4982.4	4964.5	5094.6	4951.8	4734.4	4986.3
SR3GL	4974.1	4978.2	4975.7	4923
SR4EU	4974.1	4978.2	4975.7	4923		4984	4982.4	4964.5	5094.6	4951.8	4734.4	4986.3
SR4NA	4974.1	4978.2	4975.7	4923		4984	4982.4	4964.5	5094.6	4951.8	4734.4	4986.3
SR4SA	4974.1	4978.2	4975.7	4923		4984	4982.4	4964.5	5094.6	4951.8	4734.4	4986.3
SR4EA	4974.1	4978.2	4975.7	4923		4984	4982.4	4964.5	5094.6	4951.8	4734.4	4986.3
SR4GL	4974.1	4978.2	4975.7	4923
SR5EU	4974.1	4978.2	4975.7	4923		4984	4982.4	4964.5	5094.6	4951.8	4734.4	4986.3
SR5NA	4974.1	4978.2	4975.7	4923		4984	4982.4	4964.5	5094.6	4951.8	4734.4	4986.3
SR5SA	4974.1	4978.2	4975.7	4923		4984	4982.4	4964.5	5094.6	4951.8	4734.4	4986.3
SR5EA	4974.1	4978.2	4975.7	4923		4984	4982.4	4964.5	5094.6	4951.8	4734.4	4986.3
SR5GL	4974.1	4978.2	4975.7	4923
Notes:	Values differ between models because they have different top levels.

## Sheet: Table S3
Table S3: Methane lifetime with respect to tropospheric OH (years).
	FRSGCUCI-v01	GISS-PUCCINI-modelE	MOZARTGFDL-v2	TM5-JRC-cy2-ipcc-v1		MOZECH-v16	CAMCHEM-3311m13	GMI-v02f	INCA-vSSz	LLNL-IMPACT-T5a	STOC-HadAM3-v01	UM-CAM-v01		4MM	MMM
SR1	8.70024	10.8758	10.4356	9.02012		11.1975	11.8629	10.3797	10.0246	6.18728	9.30778	12.4967		9.75795	10.0444
SR1 (Global)	8.70562	10.8881	10.4469	9.0367										9.76932	9.76932
SR2	8.06732	10.1558	9.816	8.36807		10.5579	11.161	9.77542	9.43578	5.78015	8.77383	11.8663		9.10181	9.43251
SR3EU	8.7245	10.8963	10.4707	9.04863		11.228	11.9122	10.4193	10.0543		9.33715	12.5555		9.78505	10.4647
SR3NA	8.73645	10.9114	10.4962	9.06012		11.2544	11.9405	10.458	10.073		9.35098	12.6034		9.80102	10.4884
SR3SA	8.72267	10.9023	10.4672	9.04548		11.2227	11.898	10.4198	10.0495		9.3331	12.5752		9.78441	10.4636
SR3EA	8.72802	10.9142	10.4754	9.05296		11.2371	11.9136	10.4333	10.0628		9.33678	12.5825		9.79265	10.4737
SR3GL	8.9108	11.2311	10.7859	9.26956										10.0493	10.0493
SR4EU	8.69066	10.8777	10.4317	9.00626		11.1874	11.8178	10.3762	10.0207	6.18534	9.30412	12.4735		9.75158	10.0338
SR4NA	8.69416	10.8777	10.4343	9.01516		11.1892	11.8344	10.371	10.0203	6.18642	9.30558	12.4804		9.75534	10.0371
SR4SA	8.694	10.8749	10.4323	9.01137		11.1925	11.8516	10.3751	10.0208	6.1865	9.30412	12.4857		9.75315	10.039
SR4EA	8.69324	10.8792	10.4345	9.00988		11.1912	11.8476	10.3738	10.0234	6.18704	9.30521	12.4798		9.7542	10.0386
SR4GL	8.66142	10.8884	10.4307	8.96152										9.7355	9.7355
SR5EU	8.68626	10.8476	10.4127	9.00757		11.1877	11.8397	10.3563	10.0108	6.18079	9.29754	12.4707		9.73854	10.0271
SR5NA	8.68095	10.8325	10.4142	9.00395		11.1907	11.8282	10.3509	10.0098	6.17971	9.29316	12.4595		9.73291	10.0222
SR5SA	8.68854	10.8526	10.4208	9.0079		11.1784	11.8344	10.3582	10.0063	6.1794	9.29827	12.4757		9.74245	10.0273
SR5EA	8.68186	10.8156	10.412	9.00115		11.1751	11.8134	10.3347	10	6.1777	9.29389	12.4623		9.72766	10.0153
SR5GL	8.61147	10.5176	10.3281	8.94353										9.60017	9.60017
Notes:	4MM is the four model mean - average of the 4 models that ran all experiments, including the global ones
	MMM is the multi-model mean - average of all available models for that experiment

## Sheet: Table S4
Table S4: Whole atmosphere methane lifetime, including stratospheric, chlorine and soil sinks (years).
	FRSGCUCI-v01	GISS-PUCCINI-modelE	MOZARTGFDL-v2	TM5-JRC-cy2-ipcc-v1		MOZECH-v16	CAMCHEM-3311m13	GMI-v02f	INCA-vSSz	LLNL-IMPACT-T5a	STOC-HadAM3-v01	UM-CAM-v01		4MM	MMM
SR1	7.41073	8.93281	8.63366	7.64156		9.14865	9.58803	8.59535	8.35041	5.50594	7.84701	9.99787		8.15469	8.332
SR1(Global)	7.41464	8.94106	8.64138	7.65346										8.16263	8.16263
SR2	6.94652	8.44128	8.20516	7.16836		8.71717	9.12426	8.17679	7.93779	5.18119	7.46406	9.59029		7.69033	7.90481
SR3EU	7.42833	8.94661	8.6577	7.66202		9.16901	9.62024	8.62252	8.37099		7.86788	10.0355		8.17367	8.63808
SR3NA	7.43699	8.95675	8.67506	7.67026		9.18659	9.63867	8.64895	8.38394		7.87769	10.0661		8.18477	8.6541
SR3SA	7.427	8.95064	8.65529	7.65975		9.16547	9.61096	8.62282	8.36769		7.865	10.048		8.17317	8.63727
SR3EA	7.43088	8.95869	8.66086	7.66512		9.17509	9.62117	8.63211	8.37691		7.86761	10.0527		8.17889	8.64411
SR3GL	7.56296	9.17107	8.87204	7.81983										8.35648	8.35648
SR4EU	7.40379	8.93409	8.63097	7.63161		9.14193	9.5586	8.59297	8.34767	5.50441	7.84441	9.98306		8.15011	8.32486
SR4NA	7.40632	8.93409	8.63276	7.63801		9.14311	9.56943	8.5894	8.3474	5.50527	7.84545	9.98746		8.15279	8.32715
SR4SA	7.40621	8.93217	8.63141	7.63528		9.14529	9.58065	8.59222	8.34781	5.50533	7.84441	9.99086		8.15127	8.32833
SR4EA	7.40566	8.93505	8.63291	7.63422		9.14445	9.57808	8.59133	8.34959	5.50576	7.84519	9.98706		8.15196	8.32812
SR4GL	7.38255	8.94126	8.63028	7.59946										8.13839	8.13839
SR5EU	7.40059	8.91377	8.61796	7.63256		9.1421	9.57292	8.5793	8.34084	5.5008	7.83973	9.98126		8.14122	8.32017
SR5NA	7.39674	8.90357	8.61901	7.62996		9.14412	9.56539	8.5756	8.34015	5.49995	7.83662	9.97408		8.13732	8.31683
SR5SA	7.40224	8.91713	8.62349	7.63279		9.1359	9.56943	8.58064	8.3377	5.4997	7.84025	9.98446		8.14391	8.32034
SR5EA	7.3974	8.89212	8.61751	7.62795		9.13373	9.55566	8.5645	8.33333	5.49836	7.83714	9.97587		8.13374	8.31214
SR5GL	7.34623	8.68972	8.55992	7.58652										8.0456	8.0456
Add in stratospheric, soil and Cl sinks to produce whole atmosphere lifetimes (lifetimes from Prather et al., 2012).
T_strat:	120	years
T_soil:	150	years
T_Cl:	200	years
ln(tauSR2)-ln(tauSR1)	-0.0646888	-0.0565971	-0.050905	-0.0639248		-0.0483113	-0.0495789	-0.049921	-0.0506753	-0.0607924	-0.0500328	-0.0416215		-0.0590289	-0.0533681
ln(BurdenSR2)-ln(BSR1)	-0.223264	-0.22336	-0.223334	-0.221013		-0.223043	-0.223425	-0.221408	-0.223188	-0.221237	-0.223175	-0.223129		-0.222743	-0.222689
s = dlntau/dlnB	0.289741	0.25339	0.227931	0.289236		0.216601	0.221904	0.225471	0.227052	0.274784	0.224186	0.186536		0.265074	0.239712
feedback factor=1/(1-s)	1.40794	1.33939	1.29522	1.40694		1.27649	1.28519	1.29111	1.29375	1.3789	1.28897	1.22931		1.36237	1.31756
Perturbation lifetime (yr)	10.4338	11.9645	11.1825	10.7512		11.6781	12.3224	11.0975	10.8033	7.59214	10.1146	12.2905		11.083	10.9301
Notes:	The whole atmosphere methane lifetime in the base experiment (SR1) and the perturbation lifetime, for all the HTAP models are shown in Figure 1 of the main paper.

## Sheet: Figure 1
	FRSGCUCI-v01	GISS-PUCCINI-modelE	MOZARTGFDL-v2	TM5-JRC-cy2-ipcc-v1		MOZECH-v16	CAMCHEM-3311m13	GMI-v02f	INCA-vSSz	LLNL-IMPACT-T5a	STOC-HadAM3-v01	UM-CAM-v01		4MM	MMM
Whole atmosphere lifetime	7.41073	8.93281	8.63366	7.64156		9.14865	9.58803	8.59535	8.35041	5.50594	7.84701	9.99787		8.15469	8.332
Perturbation lifetime	10.4338	11.9645	11.1825	10.7512		11.6781	12.3224	11.0975	10.8033	7.59214	10.1146	12.2905		11.083	10.9301
Notes:	This is Figure 1 of the main paper.

## Sheet: Table S5
Table S5: Equilibrium global mean methane mixing ratios (ppb) for 20% changes in regional/global emissions (concentrations for SR2).
	FRSGCUCI-v01	GISS-PUCCINI-modelE	MOZARTGFDL-v2	TM5-JRC-cy2-ipcc-v1		MOZECH-v16	CAMCHEM-3311m13	GMI-v02f	INCA-vSSz	LLNL-IMPACT-T5a	STOC-HadAM3-v01	UM-CAM-v01		4MM	MMM
SR1	1760	1760	1760	1760		1760	1760	1760	1760	1760	1760	1760		1760	1760
SR1 (Global)	1760	1760	1760	1760										1760	1760
SR2	1606.79	1631.51	1647.7	1608.62		1654.74	1651.35	1650.14	1648.31	1618.48	1650.08	1672.21		1623.65	1639.99
SR3EU	1765.89	1763.64	1766.35	1766.63		1765	1767.6	1767.19	1765.61		1766.03	1768.15		1765.63	1766.21
SR3NA	1768.79	1766.32	1770.94	1769.3		1769.32	1771.95	1774.19	1769.15		1768.88	1774.77		1768.84	1770.36
SR3SA	1765.44	1764.71	1765.71	1765.9		1764.13	1765.41	1767.27	1764.71		1765.2	1770.86		1765.44	1765.93
SR3EA	1766.74	1766.83	1767.19	1767.64		1766.5	1767.82	1769.73	1767.23		1765.96	1771.87		1767.1	1767.75
SR3GL	1809.77	1820.91	1821.09	1814.07										1816.46	1816.46
SR4EU	1757.68	1760.34	1759.29	1756.78		1758.35	1753.06	1759.37	1759.25	1759.33	1759.25	1756.8		1758.52	1758.14
SR4NA	1758.52	1760.34	1759.76	1758.85		1758.64	1755.61	1758.43	1759.18	1759.7	1759.55	1757.75		1759.37	1758.76
SR4SA	1758.49	1759.83	1759.41	1757.96		1759.18	1758.26	1759.17	1759.29	1759.73	1759.25	1758.48		1758.92	1759
SR4EA	1758.3	1760.59	1759.8	1757.62		1758.97	1757.65	1758.94	1759.78	1759.92	1759.47	1757.66		1759.08	1758.97
SR4GL	1749.29	1760.05	1757.07	1742.55										1752.24	1752.24
SR5EU	1756.61	1754.98	1755.86	1757.08		1758.39	1756.44	1755.76	1757.39	1757.74	1757.9	1756.41		1756.13	1756.78
SR5NA	1755.32	1752.29	1756.13	1756.24		1758.89	1754.66	1754.78	1757.2	1757.36	1757	1754.85		1755	1755.88
SR5SA	1757.16	1755.86	1757.31	1757.16		1756.87	1755.61	1756.11	1756.54	1757.25	1758.05	1757.1		1756.87	1756.82
SR5EA	1755.54	1749.27	1755.74	1755.59		1756.34	1752.37	1751.85	1755.35	1756.66	1757.15	1755.24		1754.04	1754.64
SR5GL	1737.18	1694.05	1738.54	1738.38										1727.04	1727.04
Notes:	The HTAP experiments (other than SR2) held methane mixing ratios fixed at a prescribed level of 1760 ppbv.
	Here we use the diagnosed whole atmosphere lifetimes, together with the calculated methane feedback factor for each model to calculate the equilibrium methane level that would have been reached if methane had been free to respond in these experiments.
	The methodology used is described in Section 3.1.2 of Stevenson et al. (2013).

## Sheet: Table S6
Table S6: Equilibrium changes in methane (ppb) for 20% changes in regional/global emissions (changes in methane concentrations in SR2).
	FRSGCUCI-v01	GISS-PUCCINI-modelE	MOZARTGFDL-v2	TM5-JRC-cy2-ipcc-v1		MOZECH-v16	CAMCHEM-3311m13	GMI-v02f	INCA-vSSz	LLNL-IMPACT-T5a	STOC-HadAM3-v01	UM-CAM-v01		4MM	MMM
SR1	0	0	0	0		0	0	0	0	0	0	0
SR1 (Global)	0	0	0	0
SR2	-153.214	-128.486	-112.3	-151.382		-105.258	-108.646	-109.859	-111.686	-141.52	-109.921	-87.7867
SR3EU	5.88681	3.64433	6.34897	6.63231		5.00257	7.60299	7.18628	5.61407		6.0344	8.14636		5.62811	6.20991		EA-NOx	7.75021
SR3NA	8.787	6.32238	10.9374	9.30498		9.3226	11.9549	14.1853	9.14842		8.87569	14.7745		8.83794	10.3613		EU-NOx	6.20991
SR3SA	5.44135	4.7062	5.71225	5.89758		4.13253	5.41225	7.26554	4.71368		5.2025	10.8624		5.43934	5.93463		NA-NOx	10.3613
SR3EA	6.74115	6.83329	7.18529	7.63859		6.49583	7.82233	9.72572	7.22929		5.95875	11.8719		7.09958	7.75021		SA-NOx	5.93463
SR3GL	49.7701	60.906	61.0886	54.0653										56.4575	56.4575
ROW	22.9138	39.3998	30.9047	24.5919										29.4525	29.4525
SR4EU	-2.32323	0.338452	-0.711729	-3.22357		-1.64818	-6.94009	-0.629281	-0.746151	-0.674389	-0.751726	-3.20492		-1.48002	-1.86498		EA-NMVOC	-1.02666
SR4NA	-1.47568	0.338452	-0.2373	-1.15244		-1.35995	-4.3866	-1.57246	-0.820735	-0.296786	-0.451104	-2.25321		-0.63174	-1.24253		EU-NMVOC	-1.86498
SR4SA	-1.51254	-0.169183	-0.593143	-2.0351		-0.824436	-1.7396	-0.82585	-0.708857	-0.269809	-0.751726	-1.51716		-1.07749	-0.995218		NA-NMVOC	-1.24253
SR4EA	-1.69685	0.592366	-0.197754	-2.38028		-1.03044	-2.34773	-1.06168	-0.223904	-0.0809502	-0.526268	-2.33977		-0.920628	-1.02666		SA-NMVOC	-0.995218
SR4GL	-10.7134	0.0529838	-2.92506	-17.4453										-7.75768	-7.75768
ROW	-3.7051	-1.0471	-1.18514	-8.65387										-3.6478	-3.6478
SR5EU	-3.39089	-5.02109	-4.14457	-2.917		-1.60701	-3.56289	-4.23991	-2.60908	-2.26418	-2.1034	-3.59399		-3.86839	-3.22309		EA-CO	-5.35572
SR5NA	-4.67798	-7.71117	-3.86881	-3.75985		-1.11283	-5.33952	-5.21879	-2.79518	-2.64105	-3.00349	-5.14869		-5.00445	-4.11612		EU-CO	-3.22309
SR5SA	-2.83879	-4.13683	-2.68608	-2.84034		-3.1292	-4.3866	-3.88728	-3.46485	-2.74871	-1.9533	-2.90221		-3.12551	-3.17947		NA-CO	-4.11612
SR5EA	-4.45745	-10.7289	-4.26273	-4.41067		-3.66346	-7.63142	-8.14963	-4.65426	-3.34059	-2.85353	-4.76025		-5.96494	-5.35572		SA-CO	-3.17947
SR5GL	-22.8183	-65.9488	-21.4592	-21.6182										-32.9611	-32.9611
ROW	-7.45314	-38.3508	-6.49698	-7.69032										-14.9978	-14.9978
Notes:	The equilibrium methane changes for the regional HTAP experiments reported here are a recalculation of those presented by Fry et al. (2012) in their Figure 4 (see plots below).
	Recreation of Figure 4 of Fry et al. (2012) using the raw HTAP data (MMM) used here.									An extract of Figure 4 of Fry et al. (2012); mean values are the central bar in the box and whiskers, and correspond to the values shown in the adjacent recreated figure.

## Sheet: Table S7ab
Table S7a: Total anthropogenic emissions in the base simulation (SR1) for the HTAP models analysed in this study. NOx in Tg(N)/yr.
		FRSGCUCI-v01	GISS-PUCCINI-modelE	MOZARTGFDL-v2	TM5-JRC-cy2-ipcc-v1		MOZECH-v16	CAMCHEM-3311m13	GMI-v02f	INCA-vSSz	LLNL-IMPACT-T5a	STOC-HadAM3-v01	UM-CAM-v01
NOx (TgN/yr)	GL	28.6	42.9	29.8	28.3		28.1	30.2	38.7	28	41.9	27.8	28.9
	EU	7.4	7.5	8.3	7.5		6.2	7.9	6.8	6.3	8.2	7.7	7.6
	NA	7.3	7.5	8.8	7.3		7.1	7.2	7.5	7.1	7.2	7.4	7.1
	EA	5.5	9.3	4.7	5.5		5.4	6	5.4	5.4	6.1	5.6	5.6
	SA	2.1	2.3	2.1	2.2		2.1	2.6	2.4	2.2	2.7	2.2	2.2
NMVOC (TgC/yr)	GL	116	131.6	49.6	113.5		77.1	123.4	65	93.1	24.8	94.3	86.9
	EU	21.3	22	10.6	24.5		17.1	39	6.2	20.5	5	21.6	19.7
	NA	15.6	16.6	6.6	17.7		21.1	24.3	12.4	24.3	2.5	15.6	14.2
	EA	19.2	19.9	7.8	24.1		14.1	17.3	13.2	17.4	1.9	19.2	17.8
	SA	11.4	12.1	8.2	14.1		8	10.4	8.7	null	2.5	11.4	10.3
CO (TgCO/yr)	GL	471	1018	556	471		480	681	931	476	571	471	477
	EU	67	69	111	67		61	85	91	62	96	69	69
	NA	95	111	100	96		67	127	114	67	110	97	99
	EA	95	170	112	95		118	189	182	114	138	97	97
	SA	62	67	72	61		85	106	91	86	114	63	63
Notes:	Values taken from Fiore et al. (2009), Supplementary Information, Data Set S3.
Table S7b: Total anthropogenic emissions in the base simulation (SR1) for the HTAP models analysed in this study. NOx in Tg(NO2)/yr. Including ROW region (=GL-EU-NA-SA-EA).
MNO2/MN	3.28571	(ratio of molecular weight of NO2/N)
	FRSGCUCI-v01	GISS-PUCCINI-modelE	MOZARTGFDL-v2	TM5-JRC-cy2-ipcc-v1		MOZECH-v16	CAMCHEM-3311m13	GMI-v02f	INCA-vSSz	LLNL-IMPACT-T5a	STOC-HadAM3-v01	UM-CAM-v01
NOx (TgNO2/yr)
EU	24.3143	24.6429	27.2714	24.6429		20.3714	25.9571	22.3429	20.7	26.9429	25.3	24.9714
NA	23.9857	24.6429	28.9143	23.9857		23.3286	23.6571	24.6429	23.3286	23.6571	24.3143	23.3286
SA	6.9	7.55714	6.9	7.22857		6.9	8.54286	7.88571	7.22857	8.87143	7.22857	7.22857
EA	18.0714	30.5571	15.4429	18.0714		17.7429	19.7143	17.7429	17.7429	20.0429	18.4	18.4
GL	93.9714	140.957	97.9143	92.9857		92.3286	99.2286	127.157	92	137.671	91.3429	94.9571
ROW	38.7714	84.1143	34.8286	37.1286		41.7286	41.0714	72.2857	40.7429	78.2	34.5	39.4286
NMVOC (TgC/yr)
EU	21.3	22	10.6	24.5		17.1	39	6.2	20.5	5	21.6	19.7
NA	15.6	16.6	6.6	17.7		21.1	24.3	12.4	24.3	2.5	15.6	14.2
SA	11.4	12.1	8.2	14.1		8	10.4	8.7	null	2.5	11.4	10.3
EA	19.2	19.9	7.8	24.1		14.1	17.3	13.2	17.4	1.9	19.2	17.8
GL	116	131.6	49.6	113.5		77.1	123.4	65	93.1	24.8	94.3	86.9
ROW	67.7	80.9	24.2	57.2		30.9	49.7	37.7		14.8	45.7	42.7
CO (TgCO/yr)
EU	67	69	111	67		61	85	91	62	96	69	69
NA	95	111	100	96		67	127	114	67	110	97	99
SA	62	67	72	61		85	106	91	86	114	63	63
EA	95	170	112	95		118	189	182	114	138	97	97
GL	471	1018	556	471		480	681	931	476	571	471	477
ROW	247	771	273	247		267	363	635	261	251	242	246
Notes:	NB there are no emissions data for the SA NMVOC experiment for the INCA-vSSz model, so no results for any of the SR4 experiments are analysed for this model.

## Sheet: Table S8
Table S8: 20% anthropogenic emission changes (Tg(NO2)/yr, Tg(NMVOC as C)/yr, Tg(CO)/yr) in the HTAP experiments for each model.
	FRSGCUCI-v01	GISS-PUCCINI-modelE	MOZARTGFDL-v2	TM5-JRC-cy2-ipcc-v1		MOZECH-v16	CAMCHEM-3311m13	GMI-v02f	INCA-vSSz	LLNL-IMPACT-T5a	STOC-HadAM3-v01	UM-CAM-v01
NOx (TgNO2/yr)
SR3EU	4.86286	4.92857	5.45429	4.92857		4.07429	5.19143	4.46857	4.14	5.38857	5.06	4.99429
SR3NA	4.79714	4.92857	5.78286	4.79714		4.66571	4.73143	4.92857	4.66571	4.73143	4.86286	4.66571
SR3SA	1.38	1.51143	1.38	1.44571		1.38	1.70857	1.57714	1.44571	1.77429	1.44571	1.44571
SR3EA	3.61429	6.11143	3.08857	3.61429		3.54857	3.94286	3.54857	3.54857	4.00857	3.68	3.68
SR3GL	18.7943	28.1914	19.5829	18.5971		18.4657	19.8457	25.4314	18.4	27.5343	18.2686	18.9914
ROW	7.75429	16.8229	6.96571	7.42571		8.34571	8.21429	14.4571	8.14857	15.64	6.9	7.88571
NMVOC (TgC/yr)
SR4EU	4.26	4.4	2.12	4.9		3.42	7.8	1.24	4.1	1	4.32	3.94
SR4NA	3.12	3.32	1.32	3.54		4.22	4.86	2.48	4.86	0.5	3.12	2.84
SR4SA	2.28	2.42	1.64	2.82		1.6	2.08	1.74		0.5	2.28	2.06
SR4EA	3.84	3.98	1.56	4.82		2.82	3.46	2.64	3.48	0.38	3.84	3.56
SR4GL	23.2	26.32	9.92	22.7		15.42	24.68	13	18.62	4.96	18.86	17.38
ROW	13.54	16.18	4.84	11.44		6.18	9.94	7.54		2.96	9.14	8.54
CO (TgCO/yr)
SR5EU	13.4	13.8	22.2	13.4		12.2	17	18.2	12.4	19.2	13.8	13.8
SR5NA	19	22.2	20	19.2		13.4	25.4	22.8	13.4	22	19.4	19.8
SR5SA	12.4	13.4	14.4	12.2		17	21.2	18.2	17.2	22.8	12.6	12.6
SR5EA	19	34	22.4	19		23.6	37.8	36.4	22.8	27.6	19.4	19.4
SR5GL	94.2	203.6	111.2	94.2		96	136.2	186.2	95.2	114.2	94.2	95.4
ROW	49.4	154.2	54.6	49.4		53.4	72.6	127	52.2	50.2	48.4	49.2

## Sheet: Table S9
Table S9: Equilibrium changes in CH4(ppb) normalised to 1 Tg/yr changes in regional/global anthropogenic emissions.
NOx	FRSGCUCI-v01	GISS-PUCCINI-modelE	MOZARTGFDL-v2	TM5-JRC-cy2-ipcc-v1		MOZECH-v16	CAMCHEM-3311m13	GMI-v02f	INCA-vSSz	LLNL-IMPACT-T5a	STOC-HadAM3-v01	UM-CAM-v01		4MM	MMM
EU	1.21057	0.739429	1.16403	1.34569		1.22784	1.46453	1.60818	1.35605		1.19257	1.63114		1.11493	1.294
NA	1.83172	1.2828	1.89135	1.93969		1.99811	2.52671	2.87818	1.96078		1.8252	3.16661		1.73639	2.13011
SA	3.94301	3.11374	4.13931	4.07935		2.99459	3.1677	4.60678	3.26045		3.59856	7.51352		3.81885	4.0417
EA	1.86514	1.11812	2.32641	2.11345		1.83055	1.98392	2.74074	2.03724		1.61922	3.22606		1.85578	2.08608
GL	2.64815	2.16044	3.1195	2.90719										2.70882	2.70882
ROW	2.95498	2.34204	4.43669	3.31172										3.26136	3.26136
NMVOC	FRSGCUCI-v01	GISS-PUCCINI-modelE	MOZARTGFDL-v2	TM5-JRC-cy2-ipcc-v1		MOZECH-v16	CAMCHEM-3311m13	GMI-v02f	INCA-vSSz	LLNL-IMPACT-T5a	STOC-HadAM3-v01	UM-CAM-v01		4MM	MMM
EU	-0.54536	0.076921	-0.335721	-0.657872		-0.481925	-0.889755	-0.507485		-0.674389	-0.174011	-0.813432		-0.365508	-0.500303
NA	-0.472973	0.101943	-0.179772	-0.325547		-0.322263	-0.902593	-0.634055		-0.593572	-0.144585	-0.793385		-0.219087	-0.42668
SA	-0.663395	-0.0699105	-0.361672	-0.721666		-0.515272	-0.836345	-0.474626		-0.539618	-0.329704	-0.736487		-0.454161	-0.52487
EA	-0.441887	0.148836	-0.126765	-0.493834		-0.365403	-0.678536	-0.402152		-0.213027	-0.137049	-0.657239		-0.228413	-0.336706
GL	-0.461784	0.00201306	-0.294865	-0.768514										-0.380788	-0.380788
ROW	-0.273641	-0.0647159	-0.244864	-0.756457										-0.334919	-0.334919
CO	FRSGCUCI-v01	GISS-PUCCINI-modelE	MOZARTGFDL-v2	TM5-JRC-cy2-ipcc-v1		MOZECH-v16	CAMCHEM-3311m13	GMI-v02f	INCA-vSSz	LLNL-IMPACT-T5a	STOC-HadAM3-v01	UM-CAM-v01		4MM	MMM
EU	-0.253052	-0.363847	-0.186692	-0.217687		-0.131722	-0.209582	-0.232962	-0.210409	-0.117926	-0.15242	-0.260434		-0.25532	-0.21243
NA	-0.246209	-0.34735	-0.19344	-0.195826		-0.0830467	-0.210217	-0.228894	-0.208595	-0.120048	-0.154819	-0.260035		-0.245706	-0.204407
SA	-0.228935	-0.308719	-0.186533	-0.232815		-0.18407	-0.206915	-0.213587	-0.201445	-0.120557	-0.155024	-0.230334		-0.239251	-0.206267
EA	-0.234603	-0.315556	-0.190301	-0.232141		-0.155231	-0.201889	-0.223891	-0.204134	-0.121036	-0.147089	-0.245374		-0.24315	-0.206477
GL	-0.242232	-0.323914	-0.192978	-0.229493										-0.247154	-0.247154
ROW	-0.150873	-0.248708	-0.118992	-0.155674										-0.168562	-0.168562

[truncated: 10 more sheets: Table S10, Figure 2, Figure 3, Figure 4, Table S11ab, Table S12, Figure 5, Figure 6, Figure 7, Table S13ab]
